# Supplementary material for: Carbon dots with high quantum yields used for Fe3+ detection, information encryption and anti-counterfeiting
Source: Royal Society of Chemistry journal article supplement (doi:10.1039/d3nj03499b), 2023-01-01
Supplement: d3nj03499b1.pdf [file d3nj03499b1.pdf]

## Supporting Information

# Carbon Dots with High Quantum Yield used for Fe<sup>3+</sup> Detection, Information Encryption and Anti- counterfeiting

Daohan Zhang<sup>1</sup> · Lei Liu<sup>1,2\*</sup> · Chunyan Li<sup>1</sup>

1 College of Chemical and Pharmaceutical Engineering, Hebei University of Science and Technology, Shijiazhuang 050018, China.

2 Hebei Provincial Key Laboratory of Medicinal Molecular Chemistry - State Key Laboratory Breeding Base, Shijiazhuang 050018, China.

\* Corresponding author. E-mail: [liulei@hebust.edu.cn](mailto:liulei@hebust.edu.cn)

# Contents

1. Measuring fluorescence quantum yield and fluorescence lifetime
2. Supplementary figures and tables
3. References

## 1. Measuring fluorescence quantum yield and fluorescence lifetime

The measurement of fluorescence quantum yield was conducted using a standard method. Quinine sulfate was used as the reference substance for determining the fluorescence quantum yield. By adhering to the equation:

$$Y_u = Y_s \times \frac{F_u}{F_s} \times \frac{A_s}{A_u} \times \left(\frac{\varphi_u}{\varphi_s}\right)^2 \times 100\% \quad (1)$$

Where in "  $Y_u$  " is the quantum yield of target product, "  $Y_s$  " is the quantum yield of known reference quinine sulfate (quantum yield in water is 0.53), "  $F_u$  " is the fluorescence integrated area of target product, "  $F_s$  " is the quinine sulfate reference product Fluorescence integral area, "  $A_u$  " is the absorbance of the target product, "  $A_s$  " is the absorbance of the reference product of quinine

sulfate, " $\frac{\varphi_u}{\varphi_s}$ " is the ratio of the refractive index of the solvent, and the solvent is water.

All tested fluorescence decay curves could be well fitted with double exponential functions. The average lifetime  $\tau_{avg}$  of B-CDs with and without  $Fe^{3+}$  was determined by the following equation:

$$\tau_{avg} = \frac{B_1\tau_1^2 + B_2\tau_2^2}{B_1\tau_1 + B_2\tau_2} \quad (2)$$

Where  $B_1$  and  $B_2$  are the pre-exponential factors,  $\tau_1$  and  $\tau_2$  are the decay times.

## 2. Supplementary figures and table S1

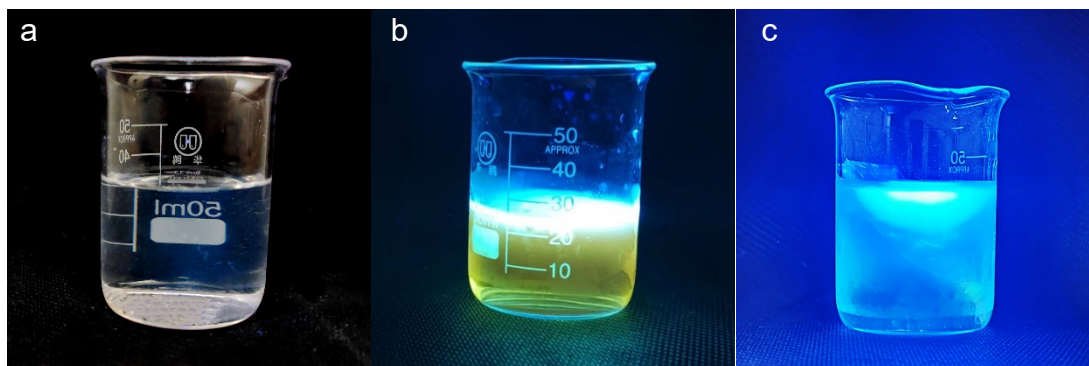

**Figure S1** Fluorescence images of B-CDs: (a) Before microwave digestion; (b) After microwave digestion; (c) After dialysis.

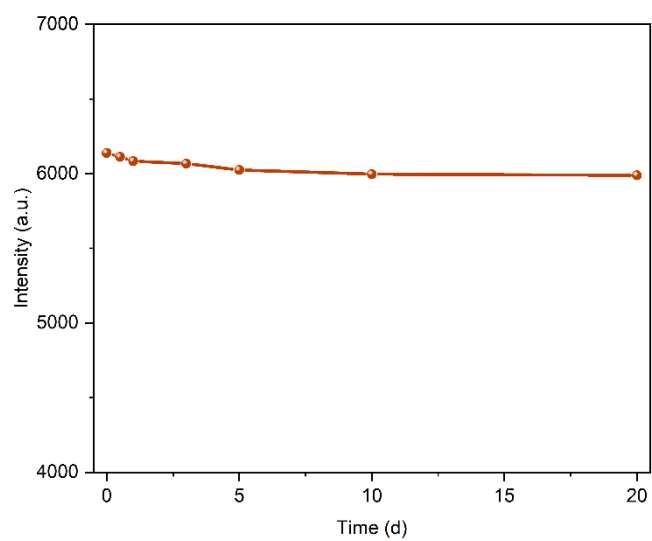

**Figure S2** The change of fluorescence intensity of B-CDs over time (0-20d).

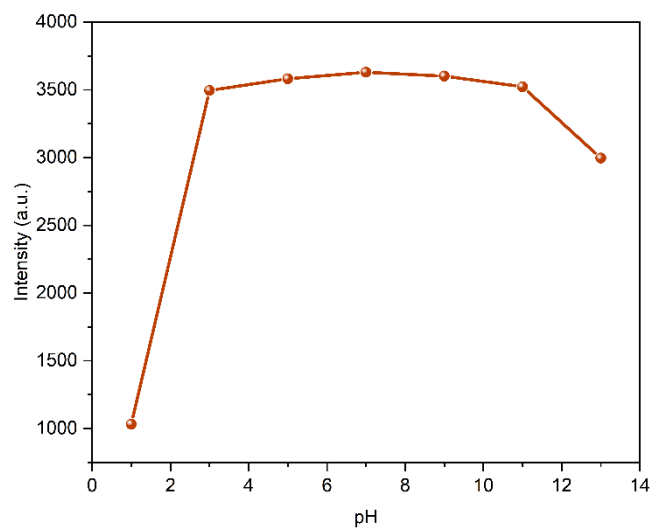

**Figure S3** The fluorescence intensity of B-CDs varies with pH.

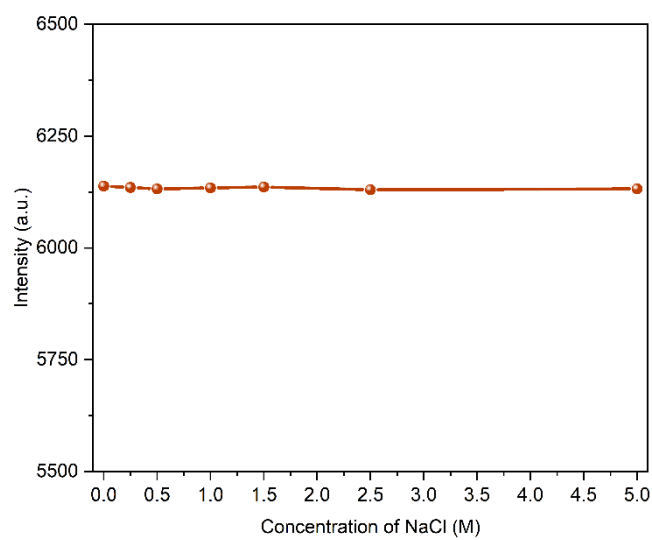

**Figure S4** Effect of different ionic strengths (0-5.0M NaCl) on fluorescence intensity of B-CDs.

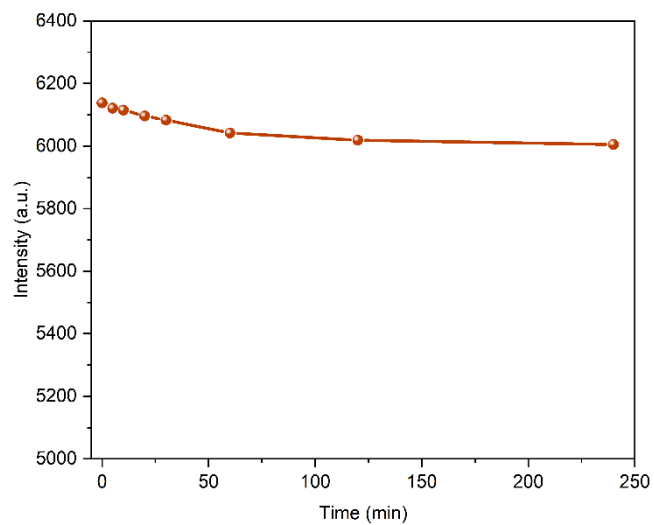

**Figure S5** Fluorescence changes of B-CDs under 365nm UV irradiation (0-240min).

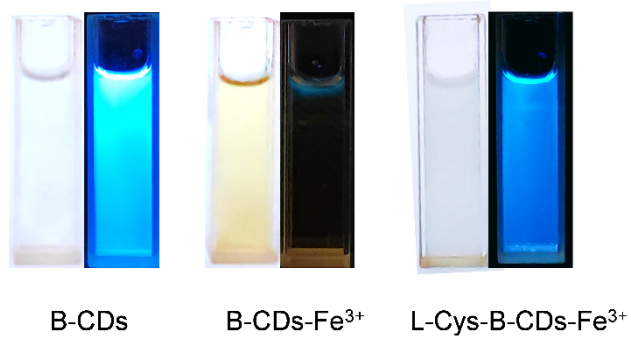

**Figure S6** Fluorescence of the "on-off - on" model under daylight and 365n UV-light.



**Table S1** Fe<sup>3+</sup> detected by different substances

| Category of test substance    | Test substance/<br>material                                                  | Linear interval                         | LOD                                                          | Reference           |
|-------------------------------|------------------------------------------------------------------------------|-----------------------------------------|--------------------------------------------------------------|---------------------|
| <b>CDs</b>                    | Coffee grounds                                                               | 0 - 2mM; R <sup>2</sup> = 0.996         | 2.25 μM                                                      | 1                   |
|                               | Glu + PPD                                                                    | 0 - 100μM; R <sup>2</sup> = 0.995       | 1.2 μM                                                       | 2                   |
|                               | (B-CQDs)/CdTe-Eu <sup>3+</sup>                                               | 0.1 - 15μM; R <sup>2</sup> = 0.9956     | 53 nm                                                        | 3                   |
|                               | Thiourea + OPD                                                               | 0.3 - 70μM; R <sup>2</sup> = 0.9995     | 0.19 μM                                                      | 4                   |
|                               | <b>CA+OPD</b>                                                                | <b>0.8 - 80μM; R<sup>2</sup>=0.9931</b> | <b>0.095 μM</b>                                              | <b>This article</b> |
| <b>Metal-organic skeleton</b> | {[Me <sub>2</sub> NH <sub>2</sub> ]<br>[TbL]·2H <sub>2</sub> O} <sub>n</sub> | 0 - 0.3mM; R <sup>2</sup> = 0.993       | —                                                            | 5                   |
|                               | JLU-MOF201-Y                                                                 | —                                       | 2.21 μM                                                      | 6                   |
|                               | JLU-MOF201-Tb                                                                | —                                       | 2.17 μM                                                      |                     |
|                               | GUPT-2                                                                       | 1 - 7μM; R <sup>2</sup> = 0.9967        | 0.446 μM                                                     | 7                   |
| <b>Metal nanocluster</b>      | INOS@ AuNCs                                                                  | 80-1000μM; R <sup>2</sup> = 0.9995      | 5.4 μM                                                       | 8                   |
|                               | GHRP-6-AuNCs                                                                 | 1.0 - 1100μM; R <sup>2</sup> = 0.996    | 14 μM                                                        | 9                   |
| <b>Organic small molecule</b> | Rhodamine + amino acid derivatives                                           | 0 - 20μM; R <sup>2</sup> = 0.996        | 0.88 μM                                                      | 10                  |
|                               | Spacer vinyl Rhodamine derivatives                                           | 1 - 50μM; R <sup>2</sup> = 0.996        | 102.3 nm                                                     | 11                  |
|                               | Quinoline thiazole derivatives                                               | 0 - 100μM; R <sup>2</sup> = 0.996       | 3.12×10 <sup>-4</sup> M(QPT)<br>2.98×10 <sup>-4</sup> M(QBT) | 12                  |
| <b>Organic polymer</b>        | Eu complex copolymer microspheres                                            | 0 - 300μM; R <sup>2</sup> = 0.996       | 2.6 μM                                                       | 13                  |
|                               | Tb complex copolymer microspheres                                            | 0 - 1500μM; R <sup>2</sup> = 0.996      | 2.1 μM                                                       | 14                  |

**Table S2** Recovery rate of B-CDs to Fe<sup>3+</sup> solutions with different concentrations

| <b>Concentration (μM)</b> | <b>Recovery rate (%)</b> | <b>RSD (%)</b> |
|---------------------------|--------------------------|----------------|
| 5                         | 101.07                   | 4.45           |
| 15                        | 102.84                   | 3.74           |
| 30                        | 98.89                    | 2.58           |
| 50                        | 100.19                   | 3.02           |
| 75                        | 98.83                    | 1.34           |

### 3. References

- (1) Jeong, G.; Park, C.; Yi, D.; Yang, H. Green synthesis of carbon dots from spent coffee grounds via ball-milling: Application in fluorescent chemosensors. *J. Cleaner Prod.* **2023**, *392*, 136250.
- (2) Zhang, X.; Li, Y.; Wang, Y.; Liu, X.; Jiang, F.; Liu, Y.; Jiang, P. Nitrogen and sulfur co-doped carbon dots with bright fluorescence for intracellular detection of iron ion and thiol. *J. Colloid Interface Sci.* **2022**, *611*, 255-264.
- (3) Huang, M.; Tong, C. A dual-emission ratiometric fluorescence probe for highly selective and simultaneous detection of tetracycline and ferric ions in environmental water samples based on a boron-doped carbon quantum dot/CdTe–Eu<sup>3+</sup> composite. *Environ. Sci.: Nano* **2022**, *9*, 1712-1723.
- (4) Liu, Q.; Niu, X.; Xie, K.; Yan, Y.; Ren, B.; Liu, R.; Li, Y.; Li, L. Fluorescent carbon dots as nanosensors for monitoring and Imaging Fe<sup>3+</sup> and [HPO<sub>4</sub>]<sup>2-</sup> Ions. *ACS Appl. Nano Mater.* **2021**, *4*, 190-197
- (5) Wang, J.; Yu, M.; Chen, L.; Li, Z.; Li, S.; Jiang, F.; Hong, M. Construction of a stable lanthanide metal-organic framework as a luminescent probe for rapid naked-eye recognition of Fe<sup>3+</sup> and acetone. *Molecules* **2021**, *26*, 1695.
- (6) Hu, Q.; Xu, T.; Gu, J.; Zhang, L.; Liu, Y. A series of isostructural lanthanide metal–organic frameworks: effective fluorescence sensing for Fe<sup>3+</sup>, 2, 4-DNP and 4-NP. *CrystEngComm* **2022**, *24*, 2759-2766.
- (7) Wang, S.; Zheng, X.; Zhang, S.; Li, G.; Xiao, Y. A study of GUPT-2, a water-stable zinc-based metal–organic framework as a highly selective and sensitive fluorescent sensor in the detection of Al<sup>3+</sup> and Fe<sup>3+</sup> ions[J]. *CrystEngComm* **2021**, *23*, 4059-4068.

- (8) Halawa, M.; Wu, F.; Nsabimana, A.; Lou, B.; Xu, G. Inositol directed facile “green” synthesis of fluorescent gold nanoclusters as selective and sensitive detecting probes of ferric ions. *Sens. Actuators, B* **2018**, *257*, 980-987.
- (9) Li, H.; Huang, H.; Feng, J.; Luo, X.; Fang, K.; Wang, Z. Ai-Jun Wang,. A polypeptide-mediated synthesis of green fluorescent gold nanoclusters for Fe<sup>3+</sup> sensing and bioimaging. *J. Colloid Interface Sci.* **2017**, *506*, 386-392.
- (10) Li, H.; Liu, Z.; Jia, R. “Turn-on” fluorescent probes based on Rhodamine B/amino acid derivatives for detection of Fe<sup>3+</sup> in water. *Spectrochim. Acta, Part A* **2021**, *247*, 119095.
- (11) Shellaiah, M.; Thirumalaivasan, N.; Aazaad, B.; Awasthi, K.; Sun, K.; Wu, S.; Lin, M. Novel rhodamine probe for colorimetric and fluorescent detection of Fe<sup>3+</sup> ions in aqueous media with cellular imaging. *Spectrochim. Acta, Part A* **2020**, *242*, 118757.
- (12) Shyamsivappan, S.; Saravanan, A.; Vandana, N.; Suresh, T.; Suresh, S.; Nandhakumar, R.; Mohanet, P.S. Novel quinoline-based thiazole derivatives for selective detection of Fe<sup>3+</sup>, Fe<sup>2+</sup>, and Cu<sup>2+</sup> ions. *ACS omega* **2020**, *5*, 27245-27253.
- (13) Zhang, C.; Luo, J.; Li W.; Ou, L.; Yu, G.; Pan, C. Preparation and sensing properties of covalent-linked europium complex monodisperse polystyrene microspheres†. *Chem. J. Chinese Universities*, **2019**, *40*, 153.
- (14) Zhang, C. Y., Luo, J. X., Li, W. J., Ou, L. J., Yu, G. P., Pan, C. Y. Selective recognition of Fe (III) in aqueous environment over covalently - bonded Tb - complex - containing fluorescent porous copolymer microspheres. *Macromol. Chem. Phys.* **2018**, *219*, 1800403.
